# Supplementary material for: Microbiome insights into pediatric familial adenomatous polyposis
Source: Springer Nature journal article supplement (doi:10.1186/s13023-022-02569-2), 2022-11-14

# Supplementary Figure 1

A.

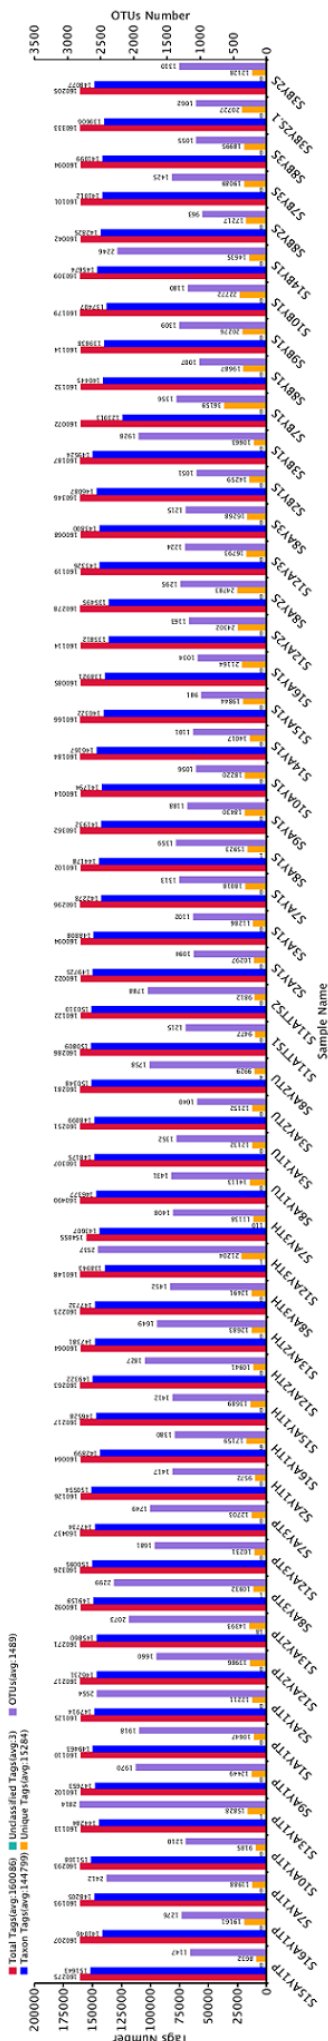

B. Class

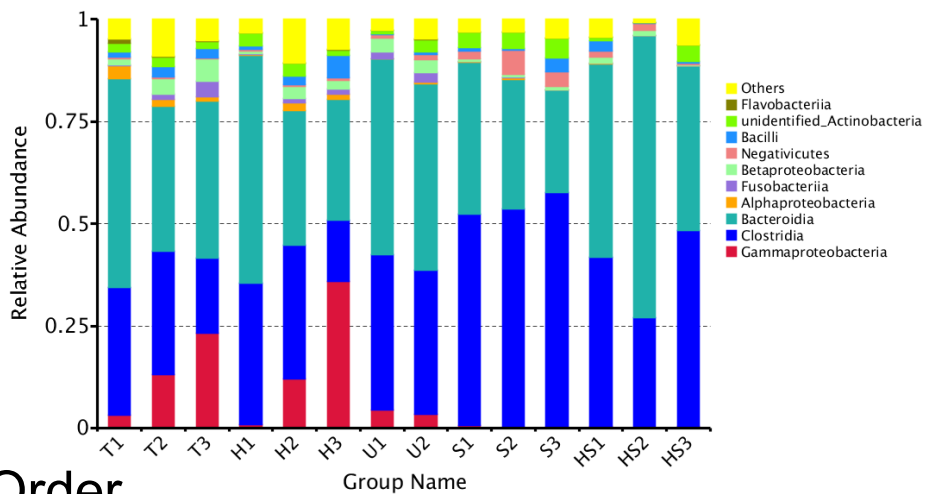

C. Order

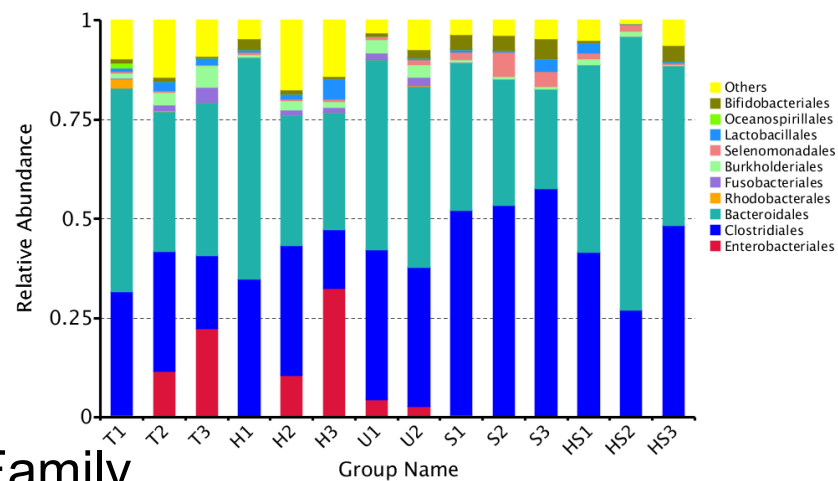

D. Family

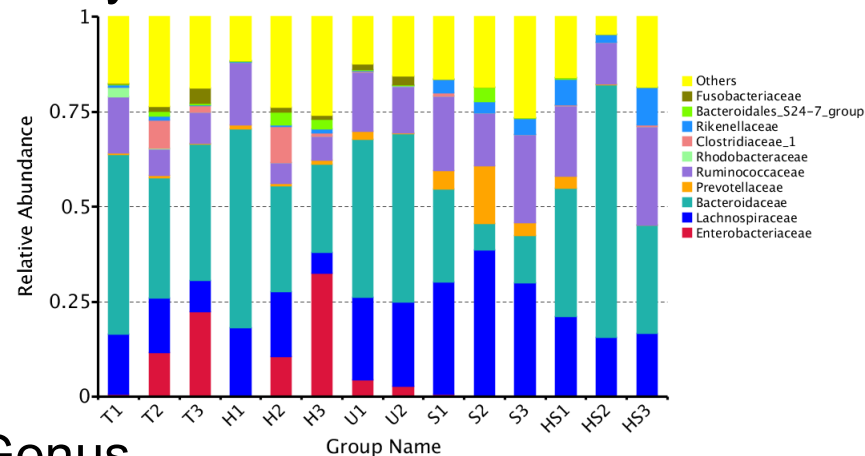

E. Genus

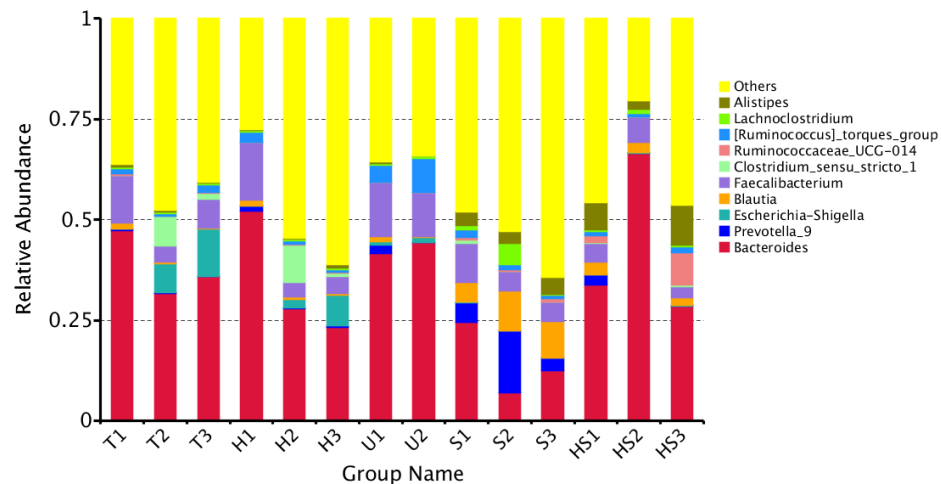

Supplement: MOESM1 [file 23710424]
