# Supplementary material for: Microbiome insights into pediatric familial adenomatous polyposis
Source: Springer Nature journal article supplement (doi:10.1186/s13023-022-02569-2), 2022-11-14

# Supplementary Figure 2

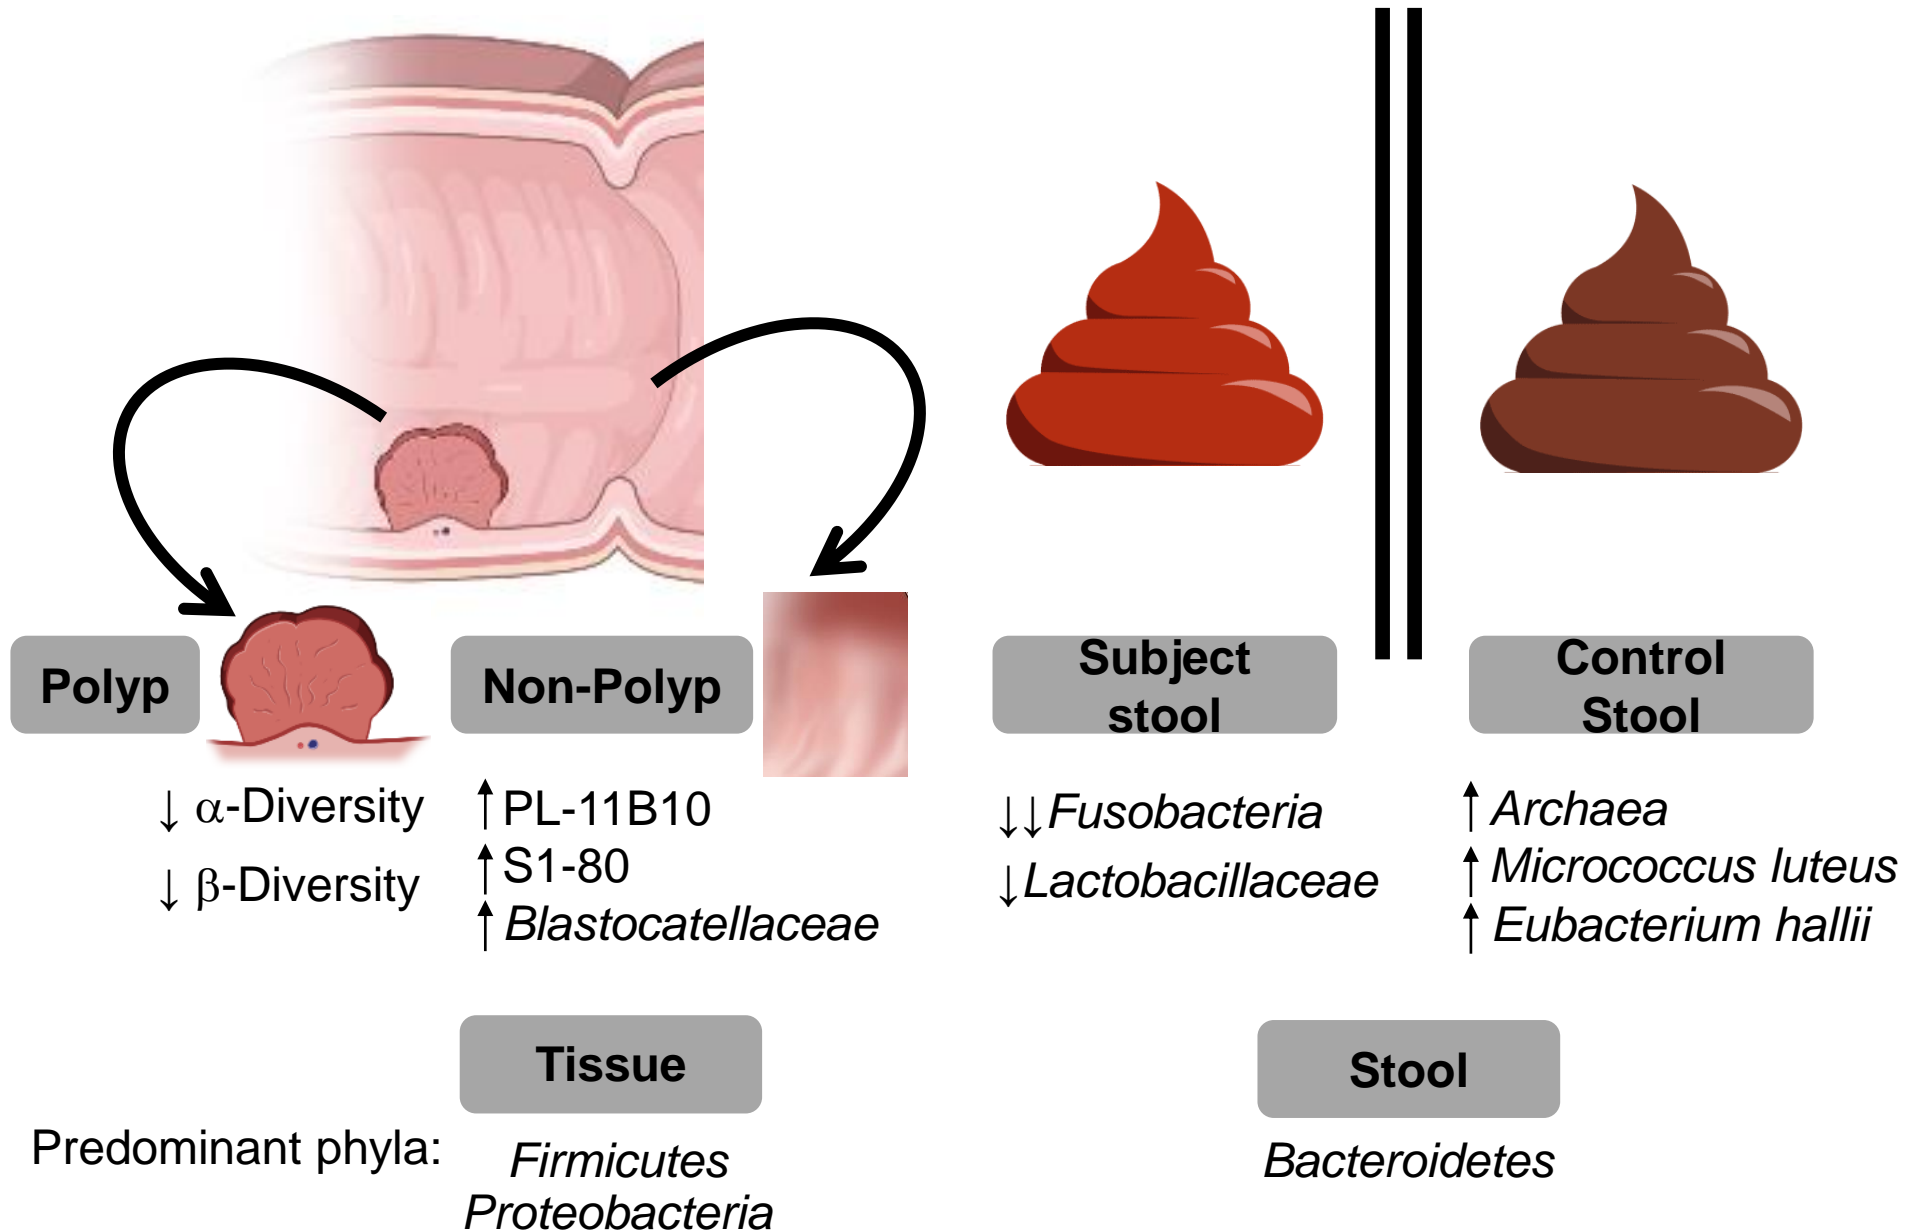

Supplement: MOESM2 [file 23710424]
